# Supplementary material
Source: HighWire-hosted journal article supplement (https://erj.ersjournals.com/content/58/1/2101090)

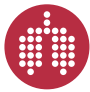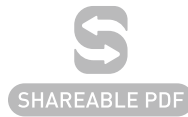

# Multidisciplinary approach for post-acute COVID-19 syndrome: time to break down the walls

David Montani <sup>1,2,3</sup>, Laurent Savale <sup>1,2,3</sup>, Antoine Beurnier<sup>1,2,4</sup>, Romain Colle <sup>1,5</sup>, Nicolas Noël<sup>1,6</sup>,  
Tài Pham <sup>1,7</sup>, Xavier Monnet <sup>1,2,7</sup> and Marc Humbert <sup>1,2,3</sup>

<sup>1</sup>Université Paris-Saclay, Faculty of Medicine, Le Kremlin-Bicêtre, France. <sup>2</sup>INSERM UMR\_S 999, Hôpital Marie Lannelongue, Le Plessis Robinson, France. <sup>3</sup>Dept of Respiratory and Intensive Care Medicine, AP-HP, Pulmonary Hypertension National Referral Centre, Hôpital Bicêtre, DMU 5 Thorinno, Le Kremlin-Bicêtre, France. <sup>4</sup>Dept of Physiology – Pulmonary Function Testing, AP-HP, DMU 5 Thorinno, Hôpital Bicêtre, Le Kremlin-Bicêtre, France. <sup>5</sup>Service de Psychiatrie, AP-HP, Hôpital de Bicêtre, DMU 11, équipe MOODS, INSERM U1018, CESP (Centre de Recherche en Épidémiologie et Santé des Populations), Le Kremlin-Bicêtre, France. <sup>6</sup>Service de Médecine Interne et Immunologie Clinique, AP-HP, Hôpital de Bicêtre, DMU 7 Endocrinologie-Immunités-Inflammations-Cancer-Urgences, Le Kremlin-Bicêtre, France. <sup>7</sup>Service de Médecine Intensive-Réanimation, AP-HP, Hôpital de Bicêtre, DMU 4 CORREVE Maladies du Coeur et des Vaisseaux, FHU Sepsis, Le Kremlin-Bicêtre, France.

Corresponding author: David Montani ([david.montani@aphp.fr](mailto:david.montani@aphp.fr))

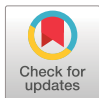

Shareable abstract (@ERSpublications)

**The importance of the COVID-19 pandemic requires us to break down the walls between medical specialties to optimise the management of patients with post-acute COVID-19 syndrome** <https://bit.ly/3gzqEik>

**Cite this article as:** Montani D, Savale L, Beurnier A, *et al.* Multidisciplinary approach for post-acute COVID-19 syndrome: time to break down the walls. *Eur Respir J* 2021; 58: 2101090 [DOI: 10.1183/13993003.01090-2021].

This single-page version can be shared freely online.

Copyright ©The authors 2021.

This version is distributed under the terms of the Creative Commons Attribution Non-Commercial Licence 4.0. For commercial reproduction rights and permissions contact [permissions@ersnet.org](mailto:permissions@ersnet.org)

Received: 14 April 2021

Accepted: 19 April 2021

Severe acute respiratory syndrome coronavirus 2 (SARS-CoV-2) has provoked an ongoing global pandemic of coronavirus disease 2019 (COVID-19), which has affected 130 million people worldwide and caused nearly 3 million deaths in just over 1 year [1]. In 2020, COVID-19 represented the third highest cause of death in the USA after heart disease and cancer [2], and this outbreak has led to the largest drop in life expectancy since World War II [2]. Evidence-based medical treatment of COVID-19 (anticoagulants, corticosteroids, anti-inflammatory drugs, oxygenation therapy and ventilation) [3] seems to have improved patients' outcomes, and the vast majority will recover spontaneously or after acute phase management.

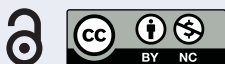

Supplement: inline-supplementary-material-1 [file inline-supplementary-material-1.pdf]
